# Supplementary material
Source: publisher figshare collection journal article supplement (https://diabetesjournals.figshare.com/articles/dataset/_/23550072)
Supplement: Supplementary file 1 [file 41313045]

## Supplementary Figures and Tables

### Supplementary Figure 1

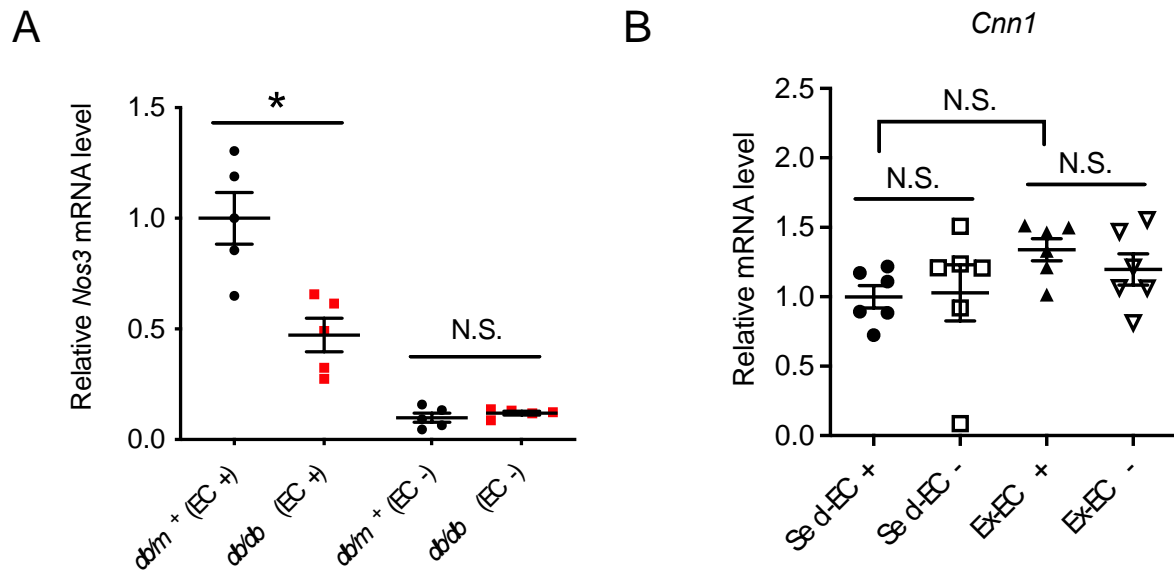

### Supplementary Figure 1. The mRNA expression level of *Nos3* and *Cnn1* in mouse aortas.

Real-time qPCR data showing *Nos3* (A) gene expression in aortas from *db/m*<sup>+</sup> and *db/db* mice and *Cnn1* (B) gene expression in aortas from C57BL/6 mice subjected to 7-day treadmill exercise. EC<sup>+</sup> indicates intact mouse aortas with endothelium, EC<sup>-</sup> indicates mouse aortas with endothelium denuded. \**p*<0.05 vs *db/m*<sup>+</sup> (EC<sup>+</sup>), unpaired two-tailed *t* test.

## Supplementary Figure 2

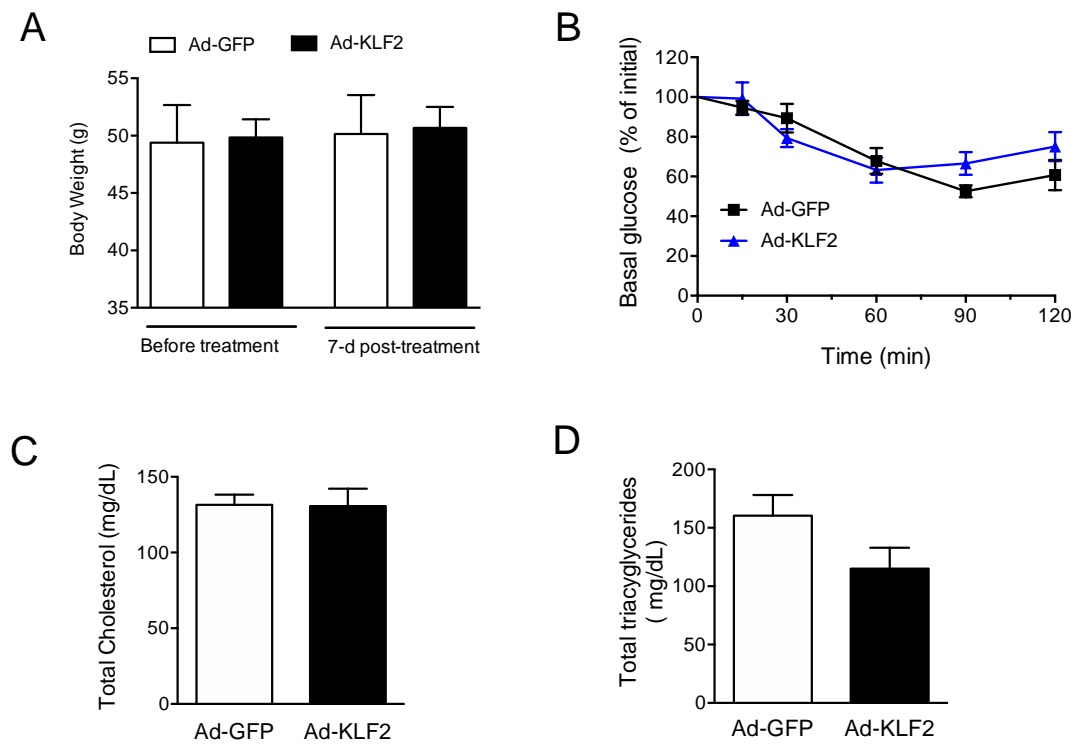

**Supplementary Figure 2. The effect of Ad-KLF2 overexpression on the body weight, insulin sensitivity and lipid profile of *db/db* mice.** Ad-KLF2 administration for 7 days to *db/db* mice does not affect body weight (A), insulin sensitivity indicated by Insulin Tolerance Test (B), total plasma cholesterol (C) and total plasma triacylglyceride levels (D).

### Supplementary Figure 3

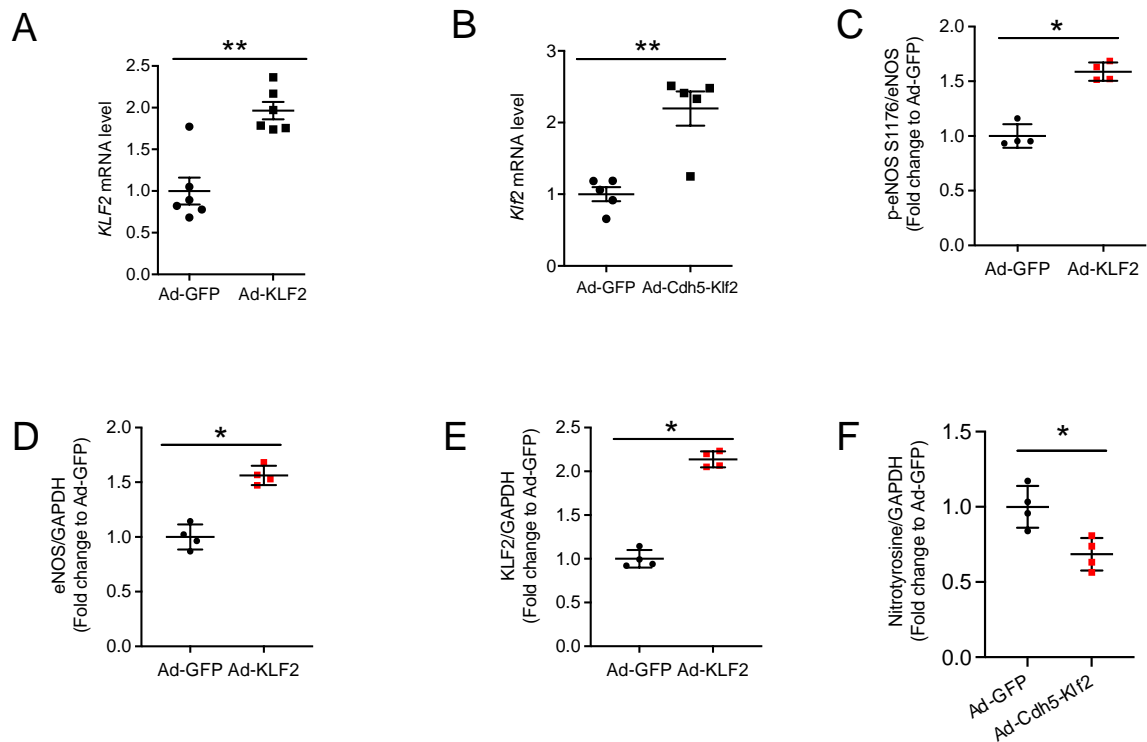

**Supplementary Figure 3. KLF2 overexpression increases levels of KLF2, eNOS and p-eNOS S1176.** QPCR results showing Ad-KLF2 (A) and Ad-Cdh5-Klf2 (B) increase KLF2 mRNA level in mouse aortas from *db/db* mice. Summarized western blotting data showing Ad-KLF2 upregulates levels of p-eNOS S1176 (C), total eNOS (D) and KLF2 (E) in mouse aortas from *db/db* mice. Summarized data showing Ad-Cdh5-Klf2 decreases the level of tyrosine nitrated proteins in aortas from *db/db* mice (F). \*\* $p < 0.001$  vs Ad-GFP, \* $p < 0.05$  vs Ad-GFP, unpaired two-tailed *t* test.

## Supplementary Figure 4

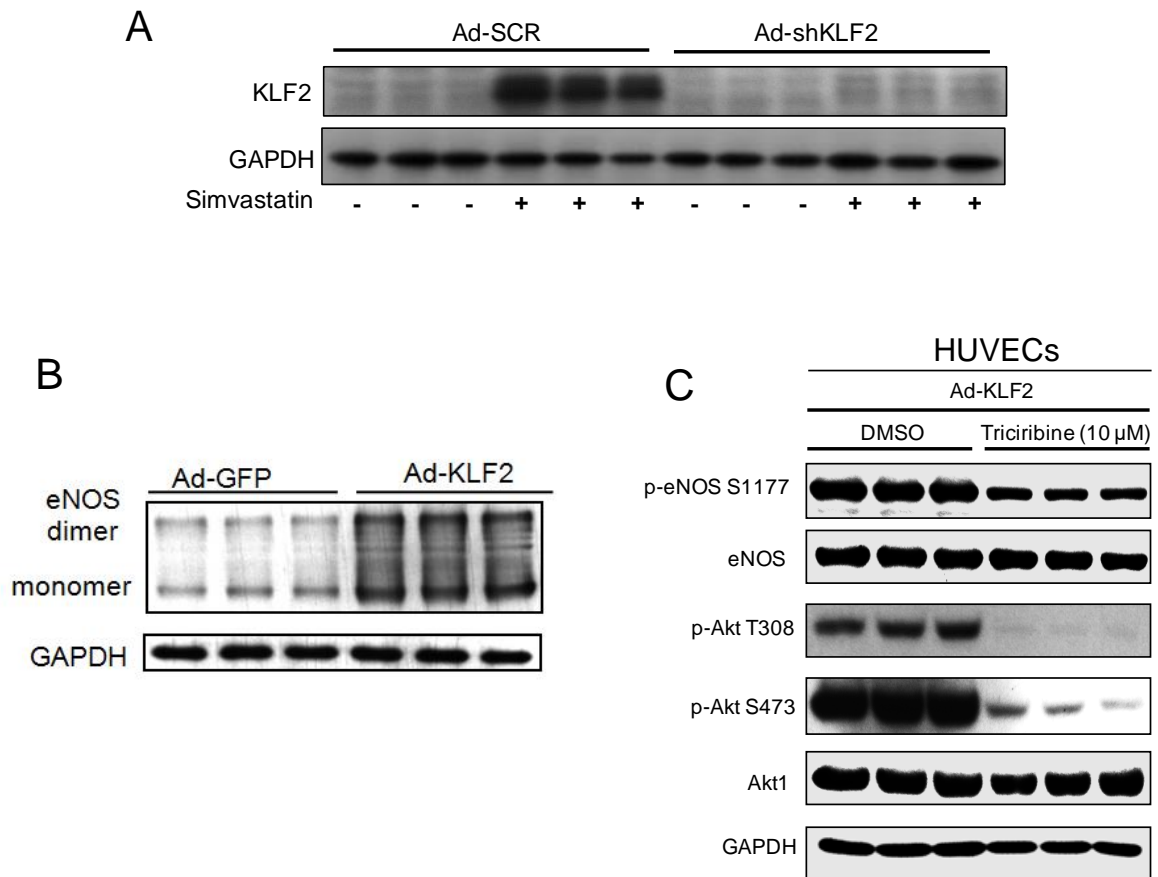

**Supplementary Figure 4. KLF2 increases eNOS dimerization and Akt inhibitor Triciribine abolished KLF2-induced p-Akt and p-eNOS.** (A) Ad-KLF2-shRNA (Ad-shKLF2) abolished simvastatin-induced expression of KLF2 in HAECs. (B) Ad-Klf2 increased level of eNOS monomer and dimer in HUVECs. (C) Triciribine (10 μM) treatment for 12 hours inhibited KLF2-induced p-Akt T308, p-Akt S473 and p-eNOS S1177 but not total Akt and eNOS.

## Supplementary Figure 5

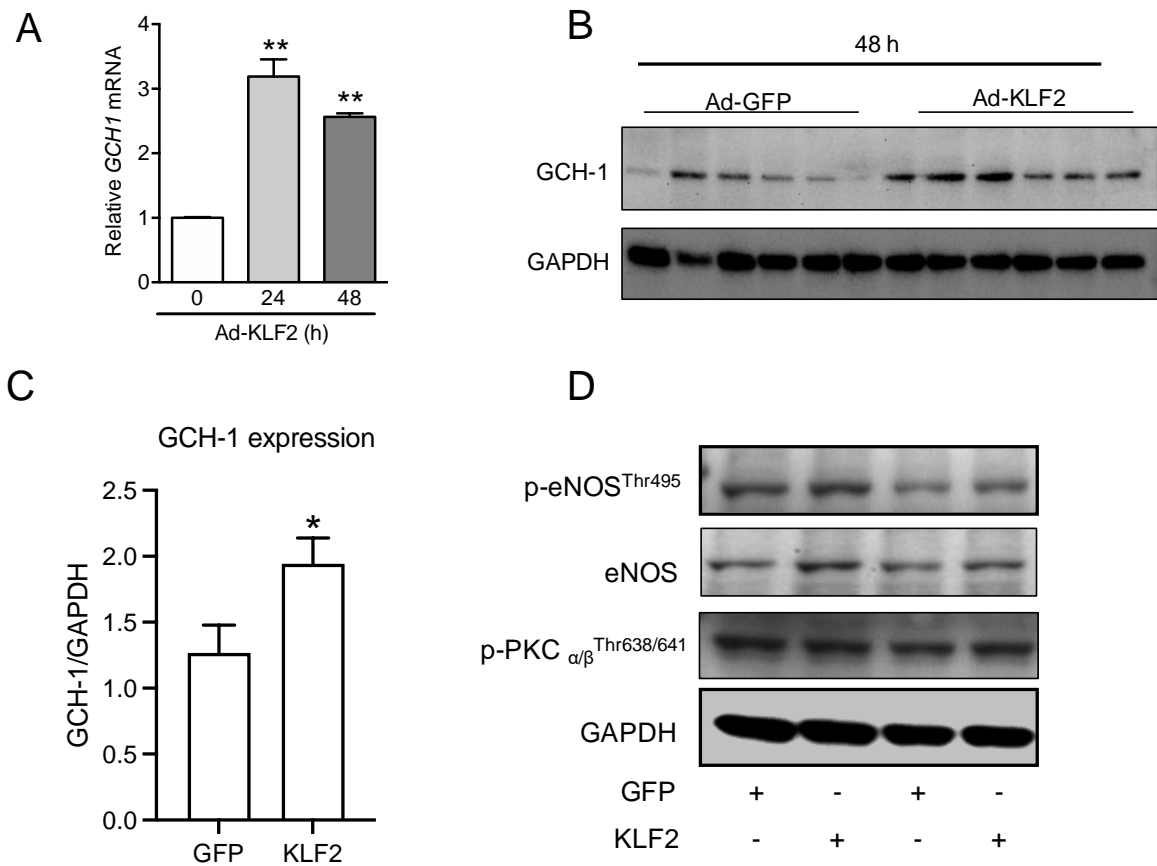

### Supplementary Figure 5. KLF2 upregulated mRNA and protein expression of GCH-1.

The qPCR results (**A**) and western blotting data (**B** and **C**) showing KLF2 overexpression increased GCH-1 mRNA and protein expression in HUVECs. \*\*  $p < 0.01$  vs Ad-GFP, One-way ANOVA with Tukey's multiple comparison test. \*  $p < 0.05$  vs Ad-GFP, unpaired two-tailed  $t$  test. (**D**) The effect of KLF2 overexpression for 24 hours on levels of p-eNOS threonine 495 and p-PKC $\alpha/\beta$  threonine 638/641 in HUVECs.

## Supplementary Figure 6

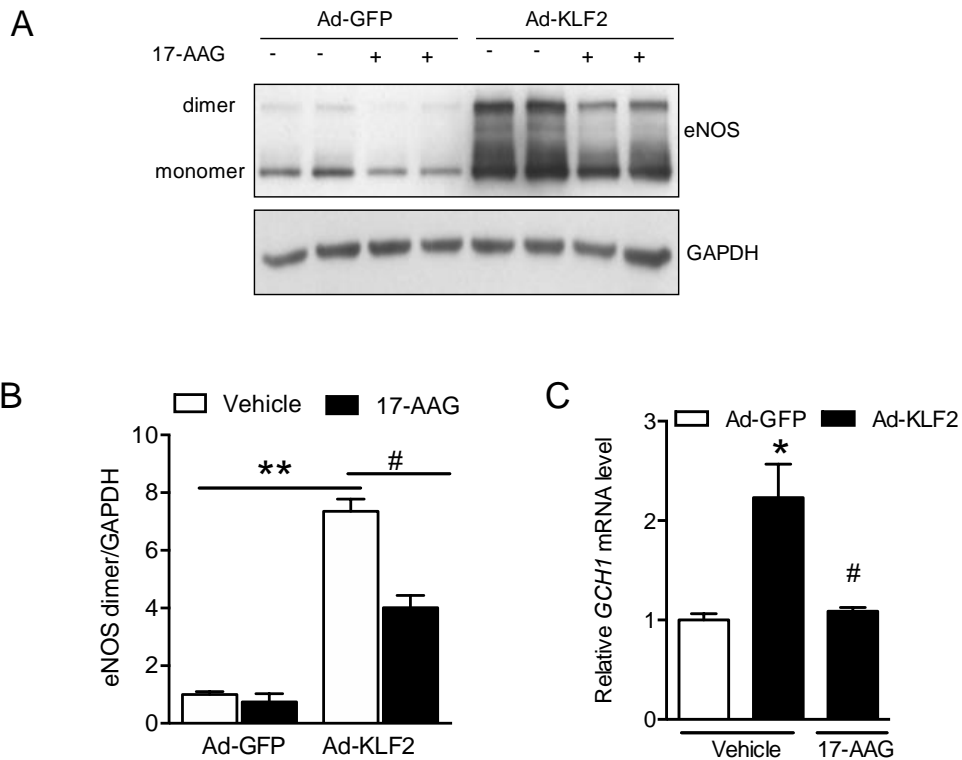

**Supplementary Figure 6. KLF2-induced eNOS dimerization and GCH1 mRNA expression were suppressed by Hsp90 inhibitor 17-AAG.** Western blotting images (A) and summarized data (B) showing 17-AAG (1  $\mu$ M) treatment for 12 hours attenuated KLF2-induced eNOS dimer formation. \*\*  $p < 0.01$  vs Ad-GFP+ Vehicle, #  $p < 0.05$  vs Ad-KLF2+Vehicle, Two-way ANOVA with Tukey's multiple comparison test. (C) *GCH1* mRNA expression induced by KLF2 was inhibited by 17-AAG (1  $\mu$ M) treatment in HUVECs. \*  $p < 0.01$  vs Ad-GFP+ Vehicle, #  $p < 0.05$  vs Ad-KLF2+Vehicle, Two-way ANOVA with Tukey's multiple comparison test.

## Supplementary Figure 7

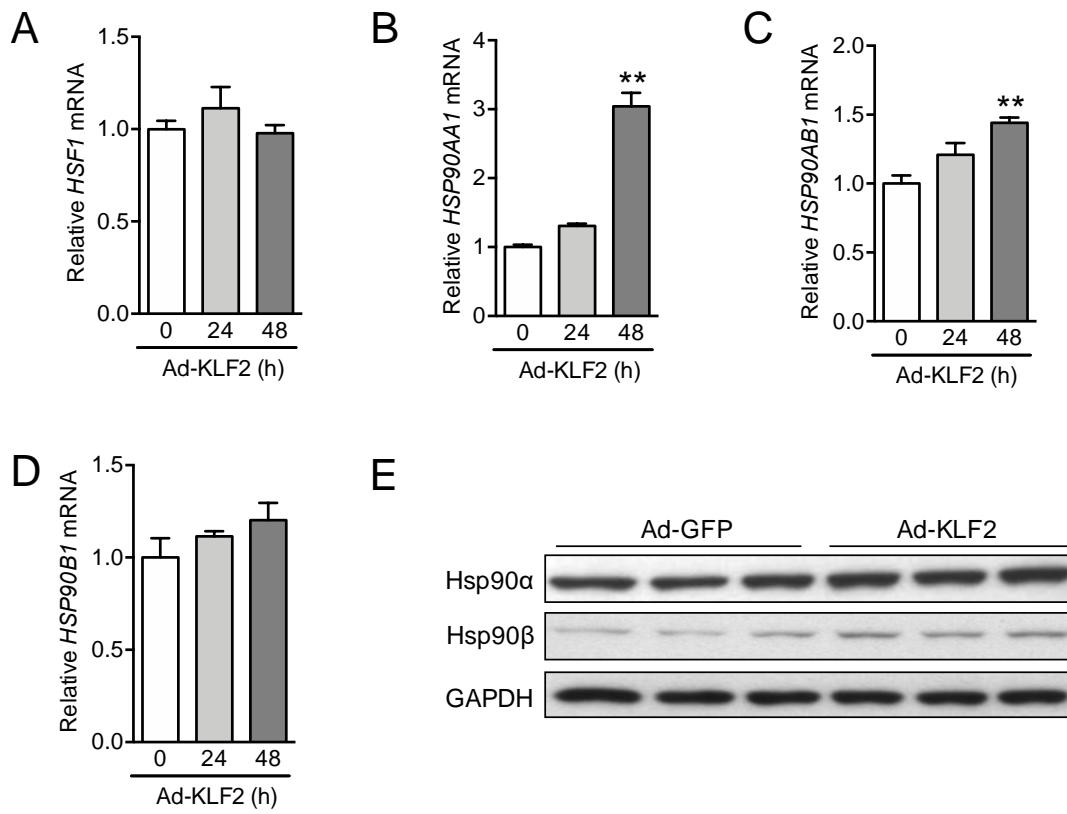

**Supplementary Figure 7. KLF2 increased the mRNA and protein level of Hsp90 $\alpha$  and Hsp90 $\beta$  but did not affect HSF1 mRNA level.** The qPCR results showing KLF2 overexpression for 24- and 48-hours upregulated mRNA expression of *HSP90AA1* (B) and *HSP90AB1*(C) but did not change the mRNA expression of *HSF1*(A) and *HSP90B1* (D). \*\*  $p < 0.01$  vs Ad-GFP, One-way ANOVA with Tukey's multiple comparison test. (E) Western blotting images showing KLF2 upregulated Hsp90 $\alpha$  and Hsp90 $\beta$  protein levels in HUVECs.

**Supplementary Table 1**

| <b>Gene name</b> | <b>Primer sequences</b>                                   | <b>Species</b> |
|------------------|-----------------------------------------------------------|----------------|
| <i>Klf2</i>      | F: CTCAGCGAGCCTATCTTGCC<br>R: CACGTTGTTTAGGTCCTCATCC      | Mouse          |
| <i>Nos3</i>      | F: TGTGACCCTCACCGCTACAA<br>R: GCACAATCCAGGCCCAATC         | Mouse          |
| <i>Gapdh</i>     | F: AGGTCGGTGTGAACGGATTTG<br>R: TGTAGACCATGTAGTTGAGGTCA    | Mouse          |
| <i>GAPDH</i>     | F: CCACTCCTCCACCTTTGAC<br>R: ACCCTGTTGCTGTAGCCA           | Human          |
| <i>KLF2</i>      | F: CTACACCAAGAGTTCGCATCTG<br>R: CCGTGTGCTTTCGGTAGTG       | Human          |
| <i>NOS3</i>      | F: TGATGGCGAAGCGAGTGAAG<br>R: ACTCATCCATACACAGGACCC       | Human          |
| <i>PLCB2</i>     | F: ATCCGGGATACTCGCTTTGG<br>R: CACCACCGTGAGTGTCTTCAG       | Human          |
| <i>PLCB3</i>     | F: TTGAGCGGTTCTGAACAAG<br>R: CACTTCGTTGAGTCTCGGGT         | Human          |
| <i>PLCB4</i>     | F: TATTCGGTCCGGAGCCATAC<br>R: GACACAAACTATCCGCCCTTC       | Human          |
| <i>PLCD3</i>     | F: CCCAAGCTGAATGCCGAGAA<br>R: TTGAGCACGTAGTCAGTCTCC       | Human          |
| <i>PLCG2</i>     | F: CATCCTATATGGCACTCAGTTTCG<br>R: TCCTGGTGTAAGATTTTCAAGCC | Human          |
| <i>INSR</i>      | F: CATCCGGGGATCACGACTG<br>R: ATCAGGTTGTAGAGGCCGAGT        | Human          |
| <i>FLT1</i>      | F: TTTGCCTGAAATGGTGAGTAAGG<br>R: TGGTTTGCTTGAGCTGTGTTT    | Human          |
| <i>TEK</i>       | F: CAGGATACGAACCATGAAGATGC<br>R: GGGGCACTGAATGGATGAAG     | Human          |
| <i>ITGA3</i>     | F: CTGCACCCCCAAAACATCACC<br>R: CTGCCACCCATCATTGTTCA       | Human          |
| <i>ITGA6</i>     | F: CAGTGGAGCCGTGGTTTTG<br>R: CCACCGCCACATCATAGCC          | Human          |
| <i>ITGB4</i>     | F: GCAGCTTCCAAATCACAGAGG<br>R: CCAGATCATCGGACATGGAGTT     | Human          |
| <i>ADCY4</i>     | F: ACCTGGCCCCGAGAGATGAA<br>R: CAGCTCCTTAGGGGAACACTC       | Human          |
| <i>RAPGEF3</i>   | F: CCTCTCCAACCTCGGTGAAGC<br>R: CTGGCTGAACAACACGGTC        | Human          |
| <i>AKT1</i>      | F: TCCTCCTCAAGAATGATGGCA<br>R: GTGCGTTCGATGACAGTGGT       | Human          |
| <i>GCH1</i>      | F: CAGCACAATGTTGGGTGTGTT<br>R: AGTACGATCGGCAACCAACG       | Human          |
| <i>HSF1</i>      | F: GCACATTCCATGCCCAAGTAT<br>R: GGCCTCTCGTCTATGCTCC        | Human          |
| <i>HSP90AA1</i>  | F: AGGAGGTTGAGACGTTTCGC<br>R: AGAGTTCGATCTTGTGTTGTTCCG    | Human          |
| <i>HSP90AB1</i>  | F: CATCTCCATGATTGGGCAGTT<br>R: CTTGACCCGCCTCTCTTCTA       | Human          |
| <i>HSP90B1</i>   | F: CCAGTTTGGTGTGCGTTTCTAT<br>R: CTGGGTATCGTTGTTGTGTTTTG   | Human          |



**Supplementary Table 2**

| <b>Target antigen</b>         | <b>Vendor or Source</b>   | <b>Catalog #</b> | <b>Working concentration</b> |
|-------------------------------|---------------------------|------------------|------------------------------|
| GAPDH                         | Cell Signaling Technology | 2118             | WB (1:2000)                  |
| KLF2                          | Millipore                 | 09-820           | WB (1:3000)<br>IHC (1:500)   |
| eNOS                          | Cell Signaling Technology | 9572             | WB (1:2000)<br>IP (1:100)    |
| Hsp90                         | Abcam                     | ab1429           | WB (1:1000)<br>IP (1:100)    |
| p-eNOS S1177                  | BD transduction           | 612392           | WB (1:1000)                  |
| p-eNOS S615                   | Millipore                 | 07-561           | WB (1:1000)                  |
| p-eNOS T495                   | Cell Signaling Technology | 9574             | WB (1:200)                   |
| p-Akt S473                    | Cell Signaling Technology | 4060             | WB (1:1000)                  |
| p-Akt T308                    | Cell Signaling Technology | 9275             | WB (1:1000)                  |
| Akt1                          | Cell Signaling Technology | 2967             | WB (1:1000)                  |
| GCH-1                         | Abcam                     | ab236387         | WB (1:500)                   |
| p-PKC $\alpha/\beta$ T638/641 | Cell Signaling Technology | 9375             | WB (1:1000)                  |
| Hsp90 $\alpha$                | Cell Signaling Technology | 8165             | WB (1:1000)                  |
| Hsp90 $\beta$                 | Cell Signaling Technology | 5087             | WB (1:1000)                  |
| Insulin receptor $\beta$      | Cell Signaling Technology | 23413            | WB (1:1000)                  |
| PLCB3                         | GeneTex, Inc              | GTX111100        | WB (1:1000)                  |
| PLCD3                         | GeneTex, Inc              | GTX123172        | WB (1:1000)                  |
| Tyrosine nitrated proteins    | Sigma-Aldrich             | 05-233           | WB (1:1000)                  |
